# Supplementary material
Source: HighWire-hosted journal article supplement (doi:10.1101/rna.079722.123)
Supplement: Supplemental_TableS1_RNaseHoligos.Northernprobes_RNA.xlsx [file Supplemental_TableS1_RNaseHoligos.Northernprobes_RNA.xlsx]

## Sheet: Sheet1
Gene	RNaseH oligo	Northern probe
act1	CGGCCGGACTCGAGAAGAAACATGTTAAAGAAAACGG	CTTTAATCGATAATCACAGCGATAAACATAACGAAAATATCGAC
adh1	AGATGCTGCAACAGCTCAAAATTCTAAACAGAC	GCAAAAGTAGTTGGTTTTCAAAGGTACAATCGTCCAACTGATGAAG
eno101	ACTTAGCAGCCTTGATGTACTTGCCAGC	CATGTATTGTAAACATTAGTAAAATTTAATGTATGCTCAGAG
fba1	GAAGCCCACCGTCTATTCAATCATTTCC	GTCTCTATATTCAAACACGTAATTTCAAAACAGTATGAACTCTC
pgk1	CATGCATTTCATCACCAAATCAATCAAAACAAGCTGACCTG	GTAAAAATAGGAAAGGAATGAGAATAATATCCAATCCATTC
rps13	GCAGTAGCAGATTCGTACTTCCAGGTAGG	GCAAGCTTCAATTAAGGGCTCACTTTCTACTAACTTAAGCAACC
ssa2	CCGCCCATTAAAAGATTTTTCTTCATGCACAG	CCTCGTTAGTCATGTCTATTACAAAAAAACATTGTTCACAAC
mug8	TGGACTGCTTCGAGATGATGAAATCGAC	GATTAAGCCAAATGAGATCAAAAGAATAAGCGTTTCATTACAAGAAGTCC
7SL		ACTCTTCGAACAGACGTGGCAGATCGAGGGATCGAAAGCG
