# Supplementary material
Source: HighWire-hosted journal article supplement (doi:10.1101/rna.079722.123)
Supplement: Supplemental_TableS2_RNAseq.pla1-Y86D_vs_WT_RNA._final.xlsx [file Supplemental_TableS2_RNAseq.pla1-Y86D_vs_WT_RNA._final.xlsx]

## Sheet: cod_UP
Systematic ID	Gene name	Product	baseMean	log2FoldChange	lfcSE	stat	pvalue	padj	WT_average_norm_count	Y86D_average_norm_count	mmi1 regulon (Chen et al. 2011)	red1Δ/WT (Lee et al. 2013)
SPAC23H3.15c	ddr48	DNA damage-responsive protein Ddr48	3086.07	4.85533	0.0667663	72.7213	0	0	206.877	5965.26
SPBP4G3.03	fub2	PI31 proteasome regulator Fub2	268.914	4.64018	0.204102	22.7346	2.03621e-114	8.34969e-113	20.8142	517.014		3.05802
SPBPB21E7.02c		phosphoglycerate mutase/6-phosphofructo-2-kinase family	57.0845	4.44082	0.41199	10.779	4.32782e-27	2.82216e-26	5.0563	109.113		1.64137
SPBPB21E7.04c	cmt2	O-methyltransferase, human COMT catechol homolog 2	2427.39	4.1162	0.156922	26.231	1.17829e-151	7.72127e-150	265.087	4589.69		3.94765
SPCC737.04		UPF0300 family protein 6	2732.2	3.99104	0.0594337	67.1511	0	0	324.217	5140.18		1.69574
SPAP8A3.04c	hsp9	heat shock protein Hsp9	21106.1	3.46841	0.0290059	119.576	0	0	3498.48	38713.7
SPAC29A4.12c	mug108	Schizosaccharomyces specific protein Mug108	220.201	3.46757	0.172685	20.0803	1.0973e-89	3.1478e-88	36.8629	403.539
SPCC1259.14c	meu27	UPF0300 family protein 5	521.283	3.34963	0.10993	30.4707	6.3665e-204	5.91024e-202	93.6845	948.882		2.3819
SPBC16E9.16c	lsd90	Lsd90 protein	1499.88	3.24978	0.0662551	49.0496	0	0	285.431	2714.32
SPAC222.15	meu13	Tat binding protein 1(TBP-1)-interacting protein (TBPIP) homolog	424.185	3.22884	0.120103	26.8838	3.39725e-159	2.36533e-157	81.5884	766.781		2.65387
SPAC4F10.17		conserved fungal protein	93.7295	3.14475	0.244136	12.8812	5.74613e-38	5.50245e-37	18.8408	168.618
SPBPB21E7.01c	eno102	enolase	215.22	3.07664	0.158062	19.4647	2.18641e-84	5.75353e-83	45.7452	384.694		2.83411
SPCC338.18		Schizosaccharomyces pombe specific protein	241.695	3.04646	0.14868	20.4901	2.63694e-93	8.05709e-92	52.3223	431.068
SPBC4F6.09	str1	plasma membrane siderophore-iron transmembrane transporter Str1	2347.96	2.93564	0.0528072	55.5916	0	0	543.025	4152.9
SPAC4H3.03c		glucan 1,4-alpha-glucosidase	297.299	2.92486	0.134752	21.7056	1.81794e-104	6.86503e-103	69.609	524.988
SPAC22H10.13	zym1	metallothionein Zym1	2164.41	2.87429	0.0550816	52.1824	0	0	520.047	3808.77		1.76708
SPBC29A10.14	rec8	meiotic cohesin complex kleisin subunit Rec8	867.894	2.85053	0.0765241	37.2501	1.05445e-303	1.60181e-301	211.381	1524.41	SPBC29A10.14	4.20445
SPBC32H8.11	mei4	DNA-binding forkhead transcription factor, meiotic Mei4	1382.96	2.8395	0.0649514	43.7173	0	0	338.67	2427.25	SPBC32H8.11	2.43722
SPAC637.03		DUF1774 family multi-spanning conserved fungal membrane protein	2569.56	2.71696	0.0485052	56.0137	0	0	679.084	4460.04		2.17229
SPAC57A10.04	mug10	meiotic Rho guanine nucleotide exchange factor	813.914	2.67869	0.0783252	34.1996	2.45051e-256	3.03319e-254	219.744	1408.08	SPAC57A10.04	4.10254
SPAC23C11.06c		vacuolar membrane hydrolase, implicted in protein catabolism	3150.95	2.63713	0.047309	55.7428	0	0	873.832	5428.07		1.85901
SPBC29A10.02	spo5	meiotic RNA-binding protein 1	913.336	2.62829	0.0775158	33.9066	5.33279e-252	6.36507e-250	254.009	1572.66	SPBC29A10.02	4.68167
SPBC56F2.06	mug147	Schizosaccharomyces specific protein Mug147	562.793	2.59904	0.0915	28.4048	1.76513e-177	1.3561e-175	159.295	966.291		1.69553
SPAC869.07c	mel1	alpha-galactosidase, melibiase	81.5155	2.58521	0.386701	6.6853	2.30453e-11	7.26236e-11	23.1553	139.876		3.38729
SPAC32A11.01	mug8	DUF1708 family conserved fungal protein, cell division site	3913.34	2.53012	0.0401068	63.0846	0	0	1155.24	6671.44	SPAC32A11.01	4.16708
SPAC15E1.02c		DUF1761 family protein	523.882	2.41012	0.0926073	26.0252	2.57149e-149	1.65268e-147	165.731	882.033
SPAC1B3.06c		UbiE family methyltransferase	8048	2.40777	0.0378586	63.5989	0	0	2552.61	13543.4
SPBC1683.09c	frp1	plasma membrane ferric-chelate reductase Frp1	214.315	2.27437	0.142698	15.9383	3.4336e-57	5.38737e-56	73.5615	355.068		1.56063
SPAC343.07	mug28	RNA-binding protein Mug28	118.398	2.20645	0.184488	11.9599	5.76605e-33	4.70577e-32	42.3442	194.452
SPBC1198.14c	fbp1	fructose-1,6-bisphosphatase Fbp1	354.183	2.20621	0.109128	20.2167	6.98302e-91	2.04713e-89	126.494	581.872
SPBPB21E7.11		Schizosaccharomyces pombe specific protein	111.632	2.18824	0.195563	11.1894	4.59476e-29	3.22938e-28	40.3516	182.912		2.01898
SPBC1921.04c		dubious	9.5036	2.16806	0.64845	3.34345	0.000827439	0.00142652	3.51083	15.4964	SPBC1921.04c	1.74827
SPCC338.12	pbi2	vaculoar proteinase B inhibitor Pbi2	2753.1	2.14375	0.0452246	47.4023	0	0	1015.26	4490.95
SPAC1002.19	urg1	GTP cyclohydrolase II Urg1	3587.58	2.13903	0.150626	14.2009	9.04339e-46	1.07364e-44	1327.34	5847.81		2.28544
SPBC1718.02	hop1	linear element associated protein Hop1	554.821	2.13775	0.0877579	24.3597	4.5807e-131	2.42995e-129	205.702	903.941
SPBC24C6.09c		phosphoketolase family protein	286.824	2.12542	0.119058	17.8519	2.79311e-71	5.70922e-70	106.965	466.682
SPCC70.09c	mug9	DUF2406 family conserved fungal protein	347.863	2.12013	0.107776	19.6717	3.77044e-86	1.02031e-84	130.307	565.419	SPCC70.09c	3.67041
SPAC26F1.11		dubious	125.108	2.0923	0.181771	11.5106	1.16643e-30	8.76988e-30	47.4688	202.748
SPBC646.17c	dic1	meiotic dynein intermediate chain Dic1	477.172	2.08465	0.0985116	21.1615	2.16423e-99	7.38047e-98	182.536	771.807	SPBC646.17c	2.69094
SPAC3A11.10c	dpe1	dipeptidyl peptidase, unknown specificity, implicated in glutathione metabolism	7284.68	2.06408	0.0386923	53.346	0	0	2813.21	11756.2
SPBC119.03	cmt1	O-methyltransferase, human COMT catechol homolog 1	4404.57	2.027	0.0395708	51.2247	0	0	1736.47	7072.67
SPACUNK4.17		NAD binding dehydrogenase family protein, human DHDH ortholog, unknown biological role, implicated in carbohydrate metabolic process	901.061	2.01724	0.0680843	29.6286	6.39907e-193	5.62781e-191	357.054	1445.07		2.60851
SPBC1347.12	arp1	dynactin complex subunit, centractin family actin-like protein Arp1	415.501	2.0047	0.0967659	20.717	2.43203e-95	7.5961e-94	165.718	665.283	SPBC1347.12	3.06533
SPBP4H10.10	rbd3	mitochondrial rhomboid family protease	312.096	1.99605	0.111509	17.9002	1.17398e-71	2.42188e-70	125.178	499.014
SPAC19G12.09		NADH/NADPH-dependent indole-3-acetaldehyde reductase, implicated in cellular detoxification	5515.84	1.99333	0.0355737	56.0339	0	0	2214.43	8817.24
SPBC19C7.04c		DUF2406 family conserved fungal protein	709.55	1.87652	0.077758	24.1328	1.13168e-128	5.73041e-127	304.411	1114.69		1.78309
SPCC191.11	inv1	external invertase, beta-fructofuranosidase Inv1	242.254	1.86321	0.130553	14.2717	3.28413e-46	3.91984e-45	104.62	379.887
SPBC725.10	tps0	mitochondrial outer membrane protein, TspO/MBR-related, implicated in lipid/sterol transport, tspO	2390.19	1.86186	0.0457563	40.6909	0	0	1031.12	3749.27		1.78599
SPAC14C4.03	mek1	Cds1/Rad53/Chk2 family protein kinase Mek1	459.02	1.82434	0.0915916	19.9181	2.83325e-88	7.85786e-87	202.112	715.928		3.77933
SPCC1672.12c	get4	TRC complex (ER membrane insertion) subunit Get4	8203.8	1.82407	0.0303495	60.1023	0	0	3613.24	12794.4
SPBC660.06	wwm2	WW domain containing conserved fungal protein Wwm2	3827.15	1.81768	0.0401138	45.3131	0	0	1690.89	5963.41
SPAC167.06c	mug143	Schizosaccharomyces specific protein Mug143	626.326	1.75884	0.0791984	22.2081	2.87023e-109	1.14194e-107	285.694	966.959
SPAPB17E12.09		Schizosaccharomyces specific protein, expressed during meiotic cell cycle	101.755	1.74349	0.188287	9.25979	2.04833e-20	1.03407e-19	46.7167	156.793		2.07566
SPBC713.14c		Schizosaccharomyces pombe specific protein	156.665	1.74128	0.16011	10.8755	1.50824e-27	9.97138e-27	71.8803	241.449
SPAC17A5.18c	rec25	meiotic recombination protein Rec25	450.63	1.72499	0.0932081	18.5069	1.81781e-76	4.16104e-75	209.542	691.718	SPAC17A5.18c	2.52126
SPBC2D10.06	rep1	MBF transcription factor activator Rep1	551.941	1.69608	0.0817805	20.7395	1.5262e-95	4.78927e-94	260.228	843.653	SPBC2D10.06	1.7572
SPBC359.06	mug14	adducin, involved in actin cytoskeleton organization	194.805	1.69549	0.274459	6.17757	6.50958e-10	1.86738e-09	91.9679	297.643
SPBC557.05		arrestin, implicated in vesicle-mediated transport	415.19	1.68321	0.104025	16.1809	6.87596e-59	1.12369e-57	197.475	632.904
SPAC2E1P3.02c	amt3	plasma membrane ammonium transmembrane transporter Amt3	253.467	1.66035	0.126642	13.1107	2.86132e-39	2.88898e-38	122.134	384.801		2.57136
SPAPJ691.02		yippee-like protein	447.296	1.65415	0.0927909	17.8266	4.39205e-71	8.92294e-70	216.131	678.461
SPAC20G4.03c	hri1	eIF2 alpha kinase Hri1	1125.38	1.64541	0.059353	27.7225	3.73928e-169	2.77704e-167	545.19	1705.58
SPAPB24D3.10c	agl1	maltose alpha-glucosidase Agl1	1000.47	1.63457	0.0681088	23.9994	2.82261e-127	1.39751e-125	488.342	1512.61
SPAPB1A11.01	mfc1	prospore membrane copper transmembrane transporter Mfc1	78.2355	1.62217	0.215431	7.52987	5.07893e-14	1.86833e-13	38.2454	118.226
SPAC23C4.07	tht2	karyogamy protein Tht2	477.634	1.61378	0.0891911	18.0935	3.58757e-73	7.66113e-72	235.484	719.785	SPAC23C4.07
SPBP8B7.04	mug45	Schizosaccharomyces specific protein Mug45	635.711	1.59318	0.0772677	20.619	1.85288e-94	5.7072e-93	316.203	955.219	SPBP8B7.04	2.71565
SPCPB16A4.07	smp4	Stm1/Oga1 family protein Smp4	649.096	1.59233	0.0767082	20.7583	1.03118e-95	3.2821e-94	323.559	974.633
SPAC6G9.13c	bqt1	bouquet formation protein Bqt1	154.828	1.58158	0.150737	10.4923	9.36827e-26	5.81407e-25	77.6861	231.97		2.22133
SPAC1F7.07c	fip1	plasma membrane iron transmembrane transporter Fip1	1116.39	1.57946	0.0665086	23.7482	1.14661e-124	5.39713e-123	560.15	1672.62
SPAC1F7.08	fio1	plasma membrane iron transport multicopper oxidase Fio1	573.868	1.57383	0.0803873	19.5781	2.37795e-85	6.35768e-84	288.64	859.095
SPAC13A11.03	mcp7	meiosis specific coiled-coil protein Mcp7	585.444	1.56406	0.0806343	19.397	8.18283e-84	2.11992e-82	295.724	875.165	SPAC13A11.03
SPAC5H10.02c	hsp3102	glyoxylase III Hsp3102	183.465	1.5621	0.140086	11.151	7.0796e-29	4.96017e-28	92.8934	274.036
SPBC725.03		pyridoxamine 5'-phosphate oxidase	626.193	1.56162	0.0791656	19.7261	1.2882e-86	3.50013e-85	317.406	934.981
SPAC5H10.04		NADPH dehydrogenase, (Old yellow enzyme) involved in small alpha,beta-unsaturated carbonyl compounds	419.733	1.55683	0.0920751	16.9082	3.91369e-64	7.05098e-63	213.054	626.411		3.64332
SPCC11E10.03	jnm1	dynactin complex subunit, dynamitin Jnm1	186.14	1.54827	0.139023	11.1368	8.30312e-29	5.78707e-28	95.0244	277.255	SPCC11E10.03	2.83558
SPCC794.04c		amino acid transmembrane transporter	159.8	1.54791	0.159966	9.67649	3.79504e-22	2.07409e-21	81.3593	238.24		1.72969
SPCC576.16c	wtf22	wtf element Wtf22 (frameshifted)	70.4873	1.54717	0.224228	6.89999	5.20065e-12	1.70481e-11	35.9712	105.003		1.89752
SPAC27D7.13c	ssm4	dynactin microtubule-binding subunit, p150-Glued Ssm4	369.58	1.53682	0.102497	14.9938	8.06505e-51	1.07598e-49	189.68	549.479	SPAC27D7.13c	2.8757
SPAC22F8.05		alpha,alpha-trehalose-phosphate synthase	1348.76	1.52491	0.0577068	26.4251	7.04491e-154	4.80491e-152	696.218	2001.31
SPAC458.04c	dli1	meiotic dynein intermediate light chain Dli1/Dil1	274.033	1.51112	0.114133	13.24	5.15831e-40	5.27189e-39	142.116	405.951	SPAC458.04c	1.91736
SPAC1F8.01	ght3	plasma membrane gluconate:proton symporter Ght3	105.178	1.5052	0.202311	7.44002	1.00667e-13	3.64694e-13	54.4745	155.881		1.92554
SPAC513.02		phosphoglycerate mutase/6-phosphofructo-2-kinase family	337.261	1.50181	0.107821	13.9287	4.23898e-44	4.8935e-43	176.048	498.474		1.66407
SPBC32F12.03c	gpx1	H2O2 scavenger glutathione peroxidase Gpx1	7744.26	1.49371	0.0301352	49.5668	0	0	4057.96	11430.6
SPCC191.01		Schizosaccharomyces specific protein	828.279	1.49231	0.0713181	20.9247	3.18777e-97	1.0548e-95	434.868	1221.69
SPCC4E9.01c	rec11	meiotic cohesin complex STAG protein Rec11	542.467	1.48477	0.0834138	17.8	7.06305e-71	1.42627e-69	285.737	799.197	SPCC4E9.01c	2.73196
SPAC1A6.08c	mug125	Schizosaccharomyces specific protein Mug125	379.208	1.47784	0.0992556	14.8892	3.87461e-50	5.04832e-49	200.5	557.916		1.59593
SPCC1906.04	wtf20	wtf antidote-like meiotic drive suppressor Wtf20	135.4	1.47625	0.158094	9.33777	9.8384e-21	5.05068e-20	71.5754	199.226
SPAC1006.01	psp3	vacuolar serine protease Psp3	5975.19	1.47342	0.0356477	41.3327	0	0	3165.29	8785.09
SPAC4H3.04c		MEMO1 family, human MEMO1 ortholog, ancient conserved protein, in some organisms this domain is present with ammecr1 which interacts with mediator complex and is implicated in transcription, implicated in signalling and localization to the plasma membrane	405.261	1.46853	0.0960094	15.2957	8.16611e-53	1.15396e-51	214.699	595.824
SPAC5H10.11	gmh1	alpha-1,2-galactosyltransferase Gmh1	78.8764	1.46837	0.212284	6.917	4.61321e-12	1.51522e-11	41.7341	116.019		1.81737
SPAC4G9.05	mpf1	meiotic pumilio family RNA-binding protein Mpf1	246.807	1.45655	0.12038	12.0995	1.0621e-33	8.89611e-33	131.947	361.668		2.00612
SPAC4G9.07	mug133	UPF0300 family protein 2	127.865	1.44449	0.167105	8.6442	5.41813e-18	2.42889e-17	68.897	186.832
SPBC119.14	rti1	Rad22 homolog Rti1	230.344	1.43771	0.122067	11.778	5.06835e-32	4.00909e-31	124.041	336.648
SPBC19F8.06c	meu22	amino acid transmembrane transporter Meu22	263.326	1.43544	0.115831	12.3925	2.86928e-35	2.5537e-34	142.006	384.646		1.95585
SPCPB16A4.06c		Schizosaccharomyces specific protein	150.593	1.4268	0.14951	9.54317	1.38529e-21	7.36619e-21	81.7331	219.453
SPAC25G10.04c	rec10	meiotic recombination protein Rec10	832.256	1.41436	0.068562	20.629	1.50839e-94	4.68933e-93	454.688	1209.82	SPAC25G10.04c	2.92137
SPAC4D7.02c	pgc1	phosphatidylglycerol phospholipase C Pgc1	1900.28	1.41049	0.0508754	27.7243	3.55391e-169	2.66903e-167	1038.26	2762.31
SPAC22G7.11c	cum1	Con-6 family conserved fungal protein	223.835	1.39776	0.125417	11.1449	7.58626e-29	5.29849e-28	123.042	324.628
SPBPB2B2.12c	gal10	UDP-glucose 4-epimerase/aldose 1-epimerase Gal10	330.53	1.39178	0.106385	13.0825	4.14676e-39	4.16796e-38	182.65	478.411		2.3642
SPCC1281.04	akr7	pyridoxal reductase	146.43	1.38423	0.154276	8.97243	2.90052e-19	1.38975e-18	81.1386	211.722
SPBC947.05c	frp2	plasma membrane ferric-chelate reductase Frp2	184.438	1.36039	0.13583	10.0153	1.30519e-23	7.50764e-23	103.569	265.307
SPCC4G3.03		WD40/YVTN repeat-like protein	266.031	1.3504	0.115401	11.7017	1.24903e-31	9.73022e-31	149.983	382.08
SPAC1556.06	meu1	Schizosaccharomyces specific protein	433.451	1.33609	0.0922799	14.4787	1.65293e-47	2.02347e-46	246.29	620.611	SPAC1556.06	4.90131
SPBPB2B2.13	gal1	galactokinase Gal1	1511.87	1.33227	0.050496	26.3837	2.10926e-153	1.42407e-151	859.47	2164.27
SPAP27G11.08c	meu32	Schizosaccharomyces specific protein Meu32	154.955	1.33144	0.149609	8.89946	5.61173e-19	2.6508e-18	88.142	221.768	SPAP27G11.08c	3.03279
SPBC3H7.08c		mitochondrial conserved fungal membrane protein	159.227	1.32716	0.147573	8.99328	2.39966e-19	1.15474e-18	90.6087	227.845		1.52386
SPCC1393.12		Schizosaccharomyces specific protein	1024.77	1.32052	0.0603546	21.8793	4.0875e-106	1.55232e-104	586.177	1463.37
SPCC330.04c	mug135	DUF1773 family protein, with repeat expansion	585.503	1.3114	0.0830971	15.7815	4.16841e-56	6.37567e-55	336.459	834.547
SPCC70.04c		Schizosaccharomyces pombe specific protein	220.767	1.30811	0.123485	10.5933	3.2019e-26	2.01711e-25	127.141	314.393		2.21182
SPBC21C3.19	rtc3	SBDS family protein Rtc3	1627.58	1.29213	0.0549107	23.5315	1.94074e-122	8.76482e-121	944.844	2310.32		1.69349
SPBC1347.03	meu14	sporulation specific PIL domain protein Meu14	177.579	1.28148	0.143049	8.95833	3.29621e-19	1.57596e-18	103.246	251.913		2.18496
SPCC16A11.15c		Schizosaccharomyces specific protein	765.211	1.25985	0.0681232	18.4938	2.31853e-76	5.25323e-75	450.843	1079.58
SPAC19A8.16	prl65	tudor domain superfamily protein	162.533	1.23984	0.155772	7.95933	1.7297e-15	6.8289e-15	96.5032	228.563
SPBC582.06c	mcp6	horsetail movement protein Hrs1/Mcp6	304.114	1.2394	0.108229	11.4516	2.30836e-30	1.71434e-29	180.822	427.405	SPBC582.06c	3.81252
SPBC660.05	wwm3	WW domain containing conserved fungal protein Wwm3	87.535	1.23445	0.196169	6.29277	3.11848e-10	9.15011e-10	52.1644	122.906		2.08022
SPBP19A11.01	gcv3	glycine decarboxylase complex subunit H	10120.8	1.23097	0.0762848	16.1365	1.41405e-58	2.28297e-57	6046.59	14194.9
SPAC2G11.05c	alx1	ESCRT-III adaptor Alx1	835.866	1.22809	0.0651368	18.8541	2.72015e-79	6.51666e-78	500.129	1171.6		1.88265
SPBC216.02	num1	meiotic cortical anchoring factor for dynein Mcp5/Num1	533.338	1.22716	0.0854619	14.3592	9.3326e-47	1.12598e-45	319.31	747.367	SPBC216.02	3.09412
SPAC20H4.11c	rho5	Rho family GTPase Rho5	408.094	1.22655	0.0927158	13.2292	5.95462e-40	6.07644e-39	244.142	572.047
SPBC1271.09	tgp1	plasma membrane glycerophosphodiester transmembrane transporter	343.246	1.21861	0.110414	11.0368	2.53988e-28	1.73054e-27	206.253	480.239		2.22629
SPBC146.11c	mug97	meiotically upregulated gene Mug97	115.157	1.20916	0.169943	7.11509	1.11837e-12	3.82756e-12	69.4886	160.824		2.09468
SPAC15A10.10	mde6	Muskelin homolog, kelch repeat, expressed during meiotic cell cycle	2177.42	1.20386	0.0479076	25.1288	2.41144e-139	1.41387e-137	1319.26	3035.58
SPBC365.12c	ish1	nuclear envelope Ish domain protein Ish1	866.582	1.19	0.0648319	18.3551	3.00433e-75	6.69365e-74	528.252	1204.91
SPAC6C3.05	meu43	Schizosaccharomyces specific protein Meu43	98.0402	1.17431	0.18974	6.18902	6.05404e-10	1.73969e-09	60.1163	135.964	SPAC6C3.05	3.26219
SPBPB2B2.02	say1	ER sterol deacetylase Say1	191.075	1.17414	0.137154	8.56069	1.12198e-17	4.93374e-17	117.716	264.434		2.16733
SPAC9G1.14		dubious	90.1313	1.17041	0.19812	5.90759	3.47152e-09	9.4056e-09	55.6653	124.597		2.65316
SPAPB8E5.10	min8	mitochondrial mini protein, single membrane pass Min8, meiosis-specific splicing in fission yeast	143.814	1.16334	0.152106	7.64824	2.03742e-14	7.63348e-14	88.8531	198.774
SPBC16A3.13	meu7	alpha-amylase homolog Aah4	213.73	1.16061	0.128232	9.05085	1.41864e-19	6.91624e-19	131.934	295.526
SPBC215.11c		aldo/keto reductase, unknown biological role	4045.05	1.1503	0.040331	28.5214	6.36418e-179	4.9463e-177	2512.82	5577.28
SPAC15A10.09c	pun1	plasma membrane anchored protein, claudin family, SUR7 subfamily, predicted membrane sensor Pun1	2720.96	1.15014	0.0438042	26.2564	6.04798e-152	4.00244e-150	1691.47	3750.44
SPAC1250.05	rpl3002	60S ribosomal protein L30	11940.6	1.14512	0.0302598	37.8429	0	0	7436.94	16444.2
SPAC4A8.04	isp6	vacuolar serine protease Isp6	2386.87	1.14259	0.043822	26.0733	7.31893e-150	4.74949e-148	1488.39	3285.34
SPBC32F12.12c		Golgi membrane protein involved in vesicle-mediated transport	6664.69	1.1344	0.032756	34.6318	8.3931e-263	1.05848e-260	4172.19	9157.19
SPAC3C7.05c	mug191	alpha-1,6- mannanase	1528.85	1.12711	0.0531468	21.2075	8.13512e-100	2.81737e-98	960.839	2096.87
SPCPB1C11.02		amino acid transmembrane transporter	162.893	1.12703	0.147818	7.62445	2.45071e-14	9.14605e-14	102.262	223.524
SPCC1183.09c	pmp31	plasma membrane proteolipid Pmp31	3717.07	1.12613	0.0411327	27.3781	5.00426e-165	3.63571e-163	2336.9	5097.24
SPBC1683.06c	urh1	uridine ribohydrolase Urh1	852.61	1.11112	0.0675958	16.4377	1.02772e-60	1.73466e-59	539.821	1165.4
SPBC106.02c	srx1	sulfiredoxin	272.849	1.10869	0.11711	9.46706	2.87839e-21	1.51132e-20	172.745	372.953
SPBC25D12.04	suc22	ribonucleotide reductase small subunit Suc22	14903.8	1.09492	0.0271606	40.3126	0	0	9505	20302.7
SPAC922.09		dubious	307.819	1.08665	0.104632	10.3854	2.8883e-25	1.77766e-24	197.382	418.256		2.57362
SPCC970.11c	wtf9	wtf antidote-like meiotic drive suppressor Wtf9	149.451	1.08598	0.151889	7.14984	8.68809e-13	2.99028e-12	95.6416	203.261
SPCC757.07c	ctt1	catalase	3012.74	1.08496	0.0411831	26.3448	5.8918e-153	3.93808e-151	1930.42	4095.06
SPAC27D7.09c		But2 family protein, similar to cell surface molecules	1707.84	1.08133	0.0610504	17.7121	3.38248e-70	6.76902e-69	1095.6	2320.08
SPAC23H4.05c		dubious	230.936	1.07121	0.122424	8.75	2.13359e-18	9.73442e-18	149.232	312.64		1.76962
SPBC16A3.16	coa5	cytochrome c oxidase assembly protein Coa5	1692.47	1.0674	0.0504747	21.1472	2.92707e-99	9.93125e-98	1094.21	2290.74
SPBC23G7.10c		NADH-dependent flavin oxidoreductase, implicated in cellular detoxification from family members	1272.37	1.06615	0.0557751	19.1152	1.8866e-81	4.63605e-80	822.672	1722.08
SPBC56F2.15	tam13	Schizosaccharomyces specific protein Tam13	1235.09	1.06578	0.112469	9.47618	2.6375e-21	1.38702e-20	798.394	1671.78
SPBC8E4.05c		fumarate lyase superfamily, unknown specificity, bacterial 3-carboxy-cis,cis-muconate cycloisomerase related	118.854	1.06291	0.164133	6.47591	9.4242e-11	2.85287e-10	77.0477	160.661		2.04848
SPBC216.03		NADP binding superfamily conserved fungal protein	1948.57	1.06158	0.0458706	23.1429	1.71522e-118	7.34906e-117	1262.49	2634.64
SPAC11D3.18c		carboxylic acid transmembrane transporter	472.353	1.05619	0.0886222	11.918	9.54238e-33	7.74045e-32	307.177	637.529
SPCC162.04c	wtf13	wtf meiotic drive antidote Wtf13	115.488	1.05445	0.174022	6.05933	1.36693e-09	3.82282e-09	75.1146	155.862
SPACUNK12.02c	cmk1	calcium/calmodulin-dependent protein kinase Cmk1	1242.91	1.05135	0.0541995	19.3977	8.0629e-84	2.09698e-82	809.013	1676.81
SPAC32A11.02c		DUF4449 family conserved fungal protein, involved in cell-cell communication in N. crassa	1606.99	1.0504	0.051264	20.4901	2.63989e-93	8.05709e-92	1047.34	2166.63
SPBC119.05c	lsb1	Wiskott-Aldrich syndrome homolog binding protein Lsb1	2581.22	1.03932	0.0436038	23.8354	1.43361e-125	6.89369e-124	1689.99	3472.44
SPBPB2B2.06c		extracellular 5'-nucleotidase, human NT5E family	103.35	1.03823	0.200455	5.17939	2.2261e-07	5.24841e-07	67.6119	139.089		4.09203
SPAC4H3.08		3-hydroxyacyl-CoA dehydrogenase	357.465	1.03278	0.103422	9.98608	1.75377e-23	1.0019e-22	234.686	480.243
SPCC70.12c	ecl1	extender of chronological lifespan protein Ecl1	757.593	1.03048	0.0746075	13.812	2.15697e-43	2.44359e-42	498.146	1017.04		2.2143
SPCC569.09		Schizosaccharomyces specific protein	935.075	1.03031	0.0683543	15.0731	2.4344e-51	3.30052e-50	614.928	1255.22
SPAC1F7.12	yak3	aldose reductase ARK13 family YakC, implicated in cellular detoxification from family members	3469.85	1.02871	0.036676	28.0486	4.15477e-173	3.15574e-171	2281.84	4657.85
SPAC15E1.10	fub1	PI31 proteasome inhibitor Fub1	998.994	1.02474	0.0612659	16.7261	8.45797e-63	1.47992e-61	658.653	1339.34
SPCC1442.02	glm2	Glomulin, ubiquitin-protein transferase inhibitor Glm2	968.113	1.02135	0.0616061	16.5787	9.93321e-62	1.72004e-60	639.557	1296.67
SPBC354.12	gpd3	glyceraldehyde 3-phosphate dehydrogenase Gpd3	8311.95	1.0206	0.0350035	29.157	6.80605e-187	5.61625e-185	5487.96	11135.9
SPBP4H10.12		protein with a role in ER insertion of tail-anchored membrane proteins	1770.59	1.02059	0.0472698	21.5908	2.1924e-103	8.14113e-102	1169.2	2371.98
SPAPB24D3.04c	mag1	DNA-3-methyladenine glycosylase Mag1	810.129	1.01756	0.0651912	15.6088	6.34092e-55	9.46043e-54	535.816	1084.44
SPAC1093.07		dubious	253.568	1.01425	0.115452	8.78503	1.56322e-18	7.20593e-18	167.988	339.149
SPCC576.01c	xan1	alpha-ketoglutarate-dependent xanthine dioxygenase Xan1	946.488	1.01119	0.0632521	15.9866	1.58495e-57	2.49854e-56	628.041	1264.93
SPAC1002.17c	urg2	uracil phosphoribosyltransferase	3119.7	1.00968	0.147071	6.8653	6.6353e-12	2.16027e-11	2070.22	4169.17		1.57962
SPAC688.04c	gst3	glutathione S-transferase Gst3	1770.04	1.00753	0.0517129	19.4831	1.52599e-84	4.04751e-83	1176.16	2363.92
SPBC16A3.02c		mitochondrial CH-OH group oxidoreductase, human RTN4IP1 ortholog, implicated in mitochondrial organization or tethering	4397.33	1.00586	0.0341644	29.4416	1.61319e-190	1.40034e-188	2924.12	5870.54
SPBC4C3.08	otg2	alpha-1,3-galactosyltransferase Otg2	239.642	1.00454	0.115922	8.66566	4.48903e-18	2.01916e-17	159.504	319.779
SPAC3G9.11c	pdc201	pyruvate decarboxylase	146.409	1.00237	0.148865	6.73345	1.65681e-11	5.25339e-11	97.4935	195.324
SPBC11C11.06c		Schizosaccharomyces specific protein	2026.14	1.00058	0.0455465	21.9683	5.78826e-107	2.23634e-105	1349.73	2702.55

## Sheet: cod_DOWN
Systematic ID	Gene name	Product	baseMean	log2FoldChange	lfcSE	stat	pvalue	padj	WT_average_norm_count	Y86D_average_norm_count
SPBCPT2R1.08c	tlh2	RecQ type DNA helicase Tlh1	99.1685	-2.84331	0.56337	-5.04697	4.48872e-07	1.03493e-06	174.071	24.2664
SPBPB7E8.01		Schizosaccharomyces specific protein, predicted GPI anchor	3275.44	-2.64605	0.046619	-56.7592	0	0	5648.33	902.547
SPAC5H10.07		Schizosaccharomyces pombe specific protein	66.7439	-2.50873	0.261269	-9.6021	7.8334e-22	4.22246e-21	113.701	19.7865
SPBC36.03c	mfs3	plasma membrane spermidine transmembrane transporter Mfs3	4930.46	-2.35113	0.0960638	-24.4746	2.7528e-132	1.48385e-130	8244.42	1616.5
SPBC1861.02	abp2	unknown protein, may bind replication origins Abp2	624.18	-2.28807	0.0962678	-23.7678	7.19482e-125	3.43501e-123	1036.03	212.327
SPBC26H8.11c	the4	acyl-coenzyme A thioesterase The4	1491.39	-2.11439	0.0670358	-31.5412	2.36501e-218	2.35936e-216	2423.13	559.651
SPCC794.12c	mae2	malic enzyme, malate dehydrogenase (oxaloacetate decarboxylating), Mae2	14962.1	-2.0917	0.0281226	-74.3779	0	0	24236.6	5687.65
SPAC1039.02		extracellular 5'-nucleotidase, human NT5E family	4347.73	-1.92504	0.0944366	-20.3845	2.29743e-92	6.91714e-91	6882.51	1812.95
SPBC13A2.04c	ptr2	plasma membrane PTR family peptide transmembrane transporter Ptr2	1289	-1.91436	0.0621792	-30.7877	3.8257e-208	3.70594e-206	2038.65	539.356
SPAC8E11.10		sorbose reductase	4474.63	-1.871	0.0394358	-47.444	0	0	7028.12	1921.14
SPBC215.04	git11	heterotrimeric G protein gamma subunit Git11	144.544	-1.75904	0.164148	-10.7162	8.54833e-27	5.50453e-26	223.397	65.6918
SPBC359.03c	aat1	plasma membrane amino acid transmembrane transporter Aat1	665.589	-1.7186	0.0783476	-21.9356	1.1899e-106	4.54476e-105	1021.33	309.85
SPCC330.03c		NADPH-hemoprotein reductase	142.699	-1.66149	0.161213	-10.3062	6.60645e-25	4.02163e-24	216.983	68.4155
SPBPJ4664.02		crazy cell surface glycoprotein	603.456	-1.64804	0.0816512	-20.184	1.35413e-90	3.95241e-89	914.355	292.557
SPBC119.17	cym1	mitochondrial metalloendopeptidase	3033.83	-1.64754	0.0398986	-41.2931	0	0	4599.21	1468.45
SPAC18G6.09c	edc1	Dcp2-Dcp1 mRNA-decapping complex subunit Edc1	183.987	-1.63389	0.142067	-11.5008	1.30664e-30	9.80199e-30	278.583	89.3903
SPBC36.02c		spermidine family transmembrane transporter	452.152	-1.62435	0.096272	-16.8725	7.17297e-64	1.28537e-62	682.473	221.831
SPBC16D10.06	zrt1	plasma membrane ZIP zinc transmembrane transporter Zrt1	1274.9	-1.62012	0.0638984	-25.3546	7.98978e-142	4.89942e-140	1924.24	625.556
SPBC25B2.08		Schizosaccharomyces pombe specific protein	208.903	-1.58545	0.135759	-11.6784	1.64298e-31	1.27545e-30	313.313	104.493
SPBC8E4.01c	pho84	plasma membrane inorganic phosphate transmembrane transporter	9344.76	-1.57715	0.0760138	-20.7482	1.27201e-95	4.02945e-94	13997.5	4692.02
SPAC16.05c	sfp1	DNA-binding transcription factor Sfp1	767.885	-1.5585	0.072741	-21.4254	7.74973e-102	2.79996e-100	1146.59	389.185
SPAC11D3.02c		ELLA family acetyltransferase	1746.24	-1.55404	0.0540469	-28.7535	8.18901e-182	6.51611e-180	2604.49	888.002
SPCC622.19	jmj4	histone demethylase jmj4	752.616	-1.52326	0.0722873	-21.0723	1.42728e-98	4.81815e-97	1116.14	389.095
SPBC354.08c	rsn1	plasma membrane calcium ion transmembrane transporter	206.317	-1.51448	0.131456	-11.5209	1.03572e-30	7.81352e-30	305.677	106.958
SPAC17D4.01	pex7	peroxin-7	13915.3	-1.5109	0.0319684	-47.2622	0	0	20602.2	7228.37
SPCC18B5.01c	bfr1	plasma membrane brefeldin A efflux transporter Bfr1	6701.34	-1.48363	0.0344352	-43.0845	0	0	9872.84	3529.85
SPAC56F8.13		dubious	75.3572	-1.46207	0.21681	-6.74358	1.54529e-11	4.91609e-11	110.614	40.0999
SPAC2E1P3.05c		fungal cellulose binding domain protein	3907.48	-1.42816	0.0428459	-33.3325	1.30694e-243	1.50614e-241	5697.3	2117.65
SPAC977.17		plasma membrane aquaporin family transmembrane transporter	570.738	-1.42727	0.0853678	-16.7191	9.51537e-63	1.66059e-61	831.364	310.113
SPBP26C9.03c	fet4	plasma membrane iron/zinc ion transmembrane transporter	153.425	-1.41925	0.153634	-9.23786	2.51471e-20	1.26474e-19	223.157	83.6932
SPBPB8B6.06c	fex2	plasma membrane fluoride export channel Fex2	76.3383	-1.40412	0.214799	-6.53691	6.28009e-11	1.92463e-10	110.848	41.8284
SPCC1393.13		metal-dependent phosphatase involved in cellular detoxification/metabolite repair	254.221	-1.4033	0.121238	-11.5748	5.53092e-31	4.21055e-30	368.714	139.729
SPCPB1C11.01	amt1	plasma membrane ammonium transmembrane transporter Amt1	367.395	-1.39694	0.10431	-13.3922	6.71255e-41	7.01041e-40	532.332	202.458
SPBC17G9.13c	cup1	mitochondrial LYR family protein Cup1	108.102	-1.38733	0.182286	-7.61072	2.72575e-14	1.01555e-13	156.112	60.0923
SPCC1223.13	cbf12	DNA-binding transcription factor, CBF1/Su(H)/LAG-1 family Cbf12	379.794	-1.37692	0.0972779	-14.1545	1.75159e-45	2.06484e-44	548.334	211.254
SPAC9E9.02		dubious	96.3862	-1.37151	0.189745	-7.2282	4.89441e-13	1.71279e-12	139.099	53.6737
SPBC1709.13c	set10	ribosomal lysine methyltransferase Set10	616.025	-1.36351	0.0772252	-17.6563	9.10432e-70	1.80574e-68	887.741	344.31
SPBC2G5.07c	rpc25	DNA-directed RNA polymerase III complex subunit Rpc25	856.027	-1.36335	0.0689251	-19.7802	4.41145e-87	1.20352e-85	1233.33	478.722
SPCC965.13		plasma membrane pyridoxal family transmembrane transporter	1964.18	-1.35678	0.0457032	-29.6867	1.14071e-193	1.0166e-191	2824.79	1103.57
SPBPB21E7.08		pseudogene	1120.64	-1.32212	0.123874	-10.6732	1.35896e-26	8.70884e-26	1600.94	640.341
SPAC3H5.05c	rps1401	40S ribosomal protein S14	4121.85	-1.31629	0.0366406	-35.9243	1.27345e-282	1.81101e-280	5881.62	2362.07
SPAC3A11.07	nde1	external mitochondrial NADH dehydrogenase (ubiquinone) Nde1/Nde2	7175.6	-1.28519	0.0320829	-40.0585	0	0	10174.8	4176.36
SPAC22G7.06c	ura1	carbamoyl-phosphate synthase (glutamine hydrolyzing), aspartate carbamoyltransferase Ura1	12131.3	-1.26238	0.026838	-47.0369	0	0	17125	7137.73
SPBC1703.08c	fau1	5-formyltetrahydrofolate cyclo-ligase Fau1	300.837	-1.24441	0.108412	-11.4786	1.69084e-30	1.26275e-29	422.86	178.814
SPAC9E9.03	leu2	3-isopropylmalate dehydratase Leu2	9476.97	-1.23868	0.0298924	-41.438	0	0	13310.7	5643.19
SPAC17C9.16c	mfs1	plasma membrane spermidine transmembrane transporter Mfs1	1993.76	-1.2326	0.0580912	-21.2183	6.47028e-100	2.26426e-98	2797.05	1190.46
SPCC330.10	pcm1	P-TEFb-cap methyltransferase Pcm1	152.888	-1.22819	0.152196	-8.06981	7.04083e-16	2.84013e-15	214.253	91.5228
SPCC553.10		conserved fungal cell surface protein, Kre9/Knh1 family	34419.9	-1.20282	0.0561887	-21.4068	1.15469e-101	4.14944e-100	47990.3	20849.5
SPBC947.06c		spermidine family transmembrane transporter	496.771	-1.19526	0.085922	-13.911	5.42799e-44	6.24453e-43	691.767	301.775
SPAC1952.07	rad1	checkpoint clamp complex protein Rad1	532.924	-1.18442	0.0807582	-14.6662	1.06135e-48	1.34612e-47	740.193	325.656
SPAPB8E5.03	mae1	plasma membrane malate/succinate:proton symporter Mae1	11074.7	-1.18145	0.0326269	-36.211	4.09152e-287	6.07727e-285	15371	6778.46
SPAP8A3.07c		phospho-2-dehydro-3-deoxyheptonate aldolase	8465.01	-1.16941	0.0312862	-37.3777	9.00533e-306	1.3998e-303	11720.3	5209.67
SPBC3F6.01c		serine/threonine protein phosphatase with TPR repeat	1348.13	-1.16902	0.0528769	-22.1083	2.62943e-108	1.02778e-106	1866.48	829.783
SPCC1739.07	cti1	exosome C1D family subunit Cti1	1024.48	-1.16424	0.0603282	-19.2985	5.53202e-83	1.40061e-81	1417.18	631.79
SPAC3H1.06c		transmembrane transporter	819.718	-1.16335	0.0687078	-16.9318	2.62224e-64	4.74988e-63	1133.18	506.255
SPAC343.16	lys2	homoaconitate hydratase Lys2	4911.91	-1.15366	0.0330847	-34.8699	2.12751e-266	2.78829e-264	6777.82	3046
SPAC343.21		dubious	83.3198	-1.1488	0.210096	-5.46798	4.55192e-08	1.13611e-07	115.072	51.5673
SPBC1685.17		Schizosaccharomyces pombe specific protein	516.148	-1.14721	0.0903316	-12.6999	5.91806e-37	5.50924e-36	711.473	320.823
SPAC513.07		flavonol reductase/cinnamoyl-CoA reductase family	2506	-1.14512	0.0959122	-11.9392	7.39049e-33	6.00949e-32	3451.33	1560.66
SPAC23C11.09	ala1	mitochondrial and cytoplasmic alanine-tRNA ligase Ala1	4702.64	-1.13734	0.0345717	-32.8981	2.34055e-237	2.52327e-235	6465.39	2939.88
SPAC5H10.06c	adh4	alcohol dehydrogenase Adh4	1989.66	-1.13259	0.0471702	-24.0107	2.1521e-127	1.07348e-125	2733.68	1245.64
SPCC74.02c	ppn1	mRNA cleavage and polyadenylation specificity factor complex associated protein	511.482	-1.12993	0.083504	-13.5315	1.01984e-41	1.09415e-40	702.107	320.858
SPAC12G12.03	cip2	RNA-binding protein Cip2	1210.98	-1.12358	0.0559813	-20.0706	1.33513e-89	3.81369e-88	1659.97	761.986
SPCC70.05c	nnk1	serine/threonine protein kinase Nnk1	1307.13	-1.12196	0.0535016	-20.9705	1.21956e-97	4.07576e-96	1791	823.269
SPAC11D3.13	hsp3104	ThiJ domain protein, implicated in cellular detoxification	902.614	-1.11373	0.0686958	-16.2125	4.11344e-59	6.75533e-58	1234.14	571.086
SPAC17A2.09c	csx1	RNA-binding protein Csx1	606.224	-1.11263	0.0771066	-14.4298	3.35965e-47	4.09779e-46	829.519	382.928
SPBC1271.15c	mti2	mitochondrial translation initiation factor IF-2Mt/Mti2	788.949	-1.11116	0.0685538	-16.2086	4.38559e-59	7.18464e-58	1078.69	499.203
SPAC12G12.05c	taf9	SAGA complex/transcription factor TFIID complex subunit Taf9	1297.75	-1.10792	0.054444	-20.3498	4.66241e-92	1.38505e-90	1772.3	823.193
SPCC613.04c	rng3	UCS-domain protein Rng3	648.781	-1.1073	0.0731172	-15.1441	8.28545e-52	1.13251e-50	886.164	411.397
SPAC23H4.06	gln1	glutamate-ammonia ligase Gln1	2945.6	-1.09787	0.0438515	-25.0361	2.4727e-138	1.41261e-136	4015.51	1875.69
SPCC1259.11c	gyp2	GTPase activating protein Gyp2	2098.29	-1.09675	0.0441401	-24.847	2.78835e-136	1.56616e-134	2859.24	1337.34
SPAPB1E7.07	glt1	glutamate synthase Glt1	6058.85	-1.09292	0.0330849	-33.0339	2.64663e-239	2.94834e-237	8251.51	3866.19
SPAC227.16c	psf3	GINS complex subunit Psf3	766.672	-1.09022	0.0685884	-15.8952	6.84423e-57	1.06885e-55	1043.35	489.99
SPBC21C3.02c	dep1	Sds3-like family protein Dep1	544.693	-1.08931	0.079403	-13.7187	7.84233e-43	8.6785e-42	741.204	348.183
SPCC188.10c		pseudogene	651.465	-1.08865	0.0734707	-14.8175	1.12897e-49	1.45958e-48	886.48	416.449
SPAC25B8.12c		HAD superfamily hydrolase, unknown role	4578.65	-1.08513	0.042226	-25.6982	1.22463e-145	7.64994e-144	6225.96	2931.33
SPCC1840.01c	mog1	Ran GTPase binding protein Mog1	750.253	-1.08433	0.0693412	-15.6376	4.03941e-55	6.06728e-54	1019.33	481.179
SPBC24C6.04	put2	delta-1-pyrroline-5-carboxylate dehydrogenase Put2	13236.3	-1.08262	0.0265153	-40.8301	0	0	17983	8489.56
SPBC1734.05c	spf31	DNAJ protein, splicing factor Spf31	465.12	-1.08126	0.0946926	-11.4186	3.37633e-30	2.47993e-29	632.223	298.016
SPBC36.01c		spermidine family transmembrane transporter	525.575	-1.07031	0.0861954	-12.4173	2.10535e-35	1.88131e-34	711.593	339.558
SPAC8C9.11	fra2	iron-sensor Fra2	166.196	-1.0668	0.141598	-7.53396	4.92229e-14	1.81171e-13	225	107.392
SPBC530.15c		spermidine family transmembrane transporter	2304.91	-1.0651	0.043601	-24.4284	8.53393e-132	4.56326e-130	3118.29	1491.52
SPBC713.05	wdr83	WD repeat protein, human MAPK organizer 1 (MORG1) family Wdr83	191.339	-1.05579	0.135362	-7.79972	6.20431e-15	2.37648e-14	258.103	124.576
SPAC2F7.09c	gep3	mitochondrial GTPase related protein Gep3	556.094	-1.04865	0.0850713	-12.3267	6.50561e-35	5.72151e-34	750.054	362.135
SPAC186.01	pfl9	cell surface glycoprotein, flocculin Pfl9, DIPSY family	306.559	-1.04306	0.42327	-2.46429	0.0137283	0.0203912	412.67	200.448
SPAC24B11.07c		oxidoreductase	507.214	-1.03817	0.0835595	-12.4243	1.92935e-35	1.72866e-34	681.82	332.607
SPCC1223.08c	dfr1	dihydrofolate reductase/ lysophospholipase fusion protein Dfr1	2949.9	-1.03354	0.0385178	-26.8329	1.33725e-158	9.21464e-157	3963.5	1936.3
SPBP4H10.15	aco2	mitochondrial ribosomal protein subunit L21/aconitate hydratase, fusion protein	9168.26	-1.0316	0.0274399	-37.5949	0	0	12313.7	6022.84
SPAC13C5.02	dre4	splicing associated factor Dre4	645.769	-1.02948	0.0806506	-12.7647	2.58053e-37	2.42934e-36	866.699	424.839
SPCC553.08c	ria1	GTPase Ria1	1213.34	-1.02779	0.0576761	-17.82	4.94307e-71	1.0012e-69	1627.41	799.273
SPBC211.04c	mcm6	MCM complex subunit Mcm6	845.984	-1.02308	0.0671936	-15.2259	2.37957e-52	3.3344e-51	1134.19	557.782
SPAC56F8.16	esc1	DNA-binding transcription factor Esc1	923.061	-1.02203	0.0651562	-15.6859	1.8899e-55	2.86441e-54	1237.28	608.844
SPCC1919.13c	bmt5	ribosome biogenesis protein Bmt5	594.072	-1.02178	0.0757715	-13.485	1.91657e-41	2.03662e-40	795.984	392.159
SPAC17A2.12	rrp1	ATP-dependent chromatin remodeler/ ubiquitin-protein ligase E3	567.977	-1.0206	0.0785854	-12.9872	1.44629e-38	1.42161e-37	761.156	374.798
SPAC29B12.10c	pgt1	plasma membrane glutathione transmembrane transporter Pgt1	1284.06	-1.01905	0.0557598	-18.2757	1.29233e-74	2.8321e-73	1720.21	847.902
SPBP4G3.02	pho1	extracellular acid phosphatase Pho1	12122.8	-1.01566	0.0826216	-12.2929	9.88406e-35	8.59103e-34	16222.4	8023.12
SPAC9E9.12c	ybt1	ABC transmembrane transporter Ybt1	652.537	-1.01218	0.0753628	-13.4307	3.9954e-41	4.19894e-40	872.657	432.417

## Sheet: nc_UP
Systematic ID	Gene name	Product	baseMean	log2FoldChange	lfcSE	stat	pvalue	padj	WT_average_norm_count	Y86D_average_norm_count	red1Δ/WT (Lee et al. 2013)
SPNCRNA.1304		intergenic RNA (predicted)	58.6349	4.13479	0.378268	10.9309	8.2068e-28	5.47994e-27	6.44928	110.821	2.34935
SPNCRNA.61	prl61	antisense RNA (predicted)	67.2543	3.99702	1.11069	3.59868	0.000319842	0.000573912	7.98446	126.524
SPNCRNA.14	prl14	antisense RNA (predicted)	280.301	3.27691	0.143489	22.8374	1.95167e-115	8.05246e-114	52.5187	508.083
SPNCRNA.1470	ser2-antisense-1	antisense RNA (predicted)	217.543	3.20154	0.159957	20.015	4.07265e-89	1.15346e-87	42.7008	392.386
SPNCRNA.1189	ctp1-antisense-1	antisense RNA (predicted), possible alternative UTR	245.169	2.8884	0.141951	20.3478	4.85703e-92	1.43648e-90	58.2364	432.102
SPNCRNA.1339		intergenic RNA (predicted)	200.299	2.85943	0.160781	17.7847	9.28475e-71	1.86926e-69	48.1703	352.427
SPNCRNA.918	rrp1-antisense-1	antisense RNA (predicted)	182.534	2.84654	0.162518	17.5153	1.09531e-68	2.11592e-67	44.4826	320.585
SPSNORNA.46	snR94	box H/ACA small nucleolar RNA snR94	3050.68	2.83787	0.0471942	60.1316	0	0	748.613	5352.75
SPNCRNA.822	seh1-antisense-1	antisense RNA (predicted)	63.7893	2.8334	0.273554	10.3577	3.85985e-25	2.36257e-24	15.6868	111.892	2.58903
SPNCRNA.1366	nam2	lncRNA nam2	1106.82	2.59713	0.166103	15.6356	4.16237e-55	6.23796e-54	314.22	1899.42	2.26893
SPNCRNA.1467	mdl1-antisense-1	antisense RNA (predicted), possible alternative UTR	151.812	2.58911	0.172211	15.0345	4.36283e-51	5.85566e-50	43.1373	260.487
SPNCRNA.1378	cbp6-antisense-1	antisense RNA (predicted), possible alternative UTR	306.826	2.42531	0.122514	19.7962	3.2082e-87	8.78836e-86	96.5766	517.076
SPNCRNA.1589	SPBC19F8.04c-antisense-1	antisense RNA (predicted)	771.629	2.41278	0.0786962	30.6594	1.98167e-206	1.89221e-204	243.731	1299.53	1.83887
SPSNORNA.24	snoR39b	small nucleolar RNA R39b (predicted)	119.414	2.39831	0.19134	12.5342	4.84931e-36	4.42798e-35	38.2713	200.557
SPNCRNA.584	lncRNA584	meiosis-specific Smp foci lncRNA	123.68	2.3894	0.185526	12.8791	5.90275e-38	5.64435e-37	39.7508	207.608
SPNCRNA.1444		intergenic RNA (predicted)	668.004	2.37785	0.0808182	29.4222	2.85474e-190	2.44629e-188	215.451	1120.56
SPNCRNA.1050	SPAC29A4.06c-antisense-1	antisense RNA (predicted), possible alternative UTR	175.545	2.35729	0.159811	14.7504	3.05653e-49	3.91377e-48	57.1701	293.921
SPNCRNA.451		non-coding RNA (predicted)	84.936	2.34098	0.220731	10.6056	2.80782e-26	1.77387e-25	28.0748	141.797
SPNCRNA.266		non-coding RNA (predicted)	96.6871	2.33705	0.210225	11.1169	1.03778e-28	7.18067e-28	31.8736	161.501	2.26526
SPNCRNA.816	SPAC17G8.02-antisense-1	antisense RNA (predicted)	72.3564	2.33544	0.243278	9.59989	8.00331e-22	4.31057e-21	24.0175	120.695
SPNCRNA.1526	exo1-antisense-1	antisense RNA (predicted)	152.993	2.30194	0.166942	13.7889	2.97329e-43	3.34571e-42	51.7189	254.268
SPNCRNA.1435	mug93-antisense-1	antisense RNA (predicted)	479.274	2.29509	0.0947202	24.2302	1.06845e-129	5.49348e-128	162.081	796.466	1.68609
SPNCRNA.1539	prp1-antisense-1	antisense RNA (predicted)	70.5273	2.27633	0.244379	9.31473	1.22266e-20	6.26224e-20	24.1517	116.903
SPNCRNA.540	SPAPB1A11.05	intergenic RNA (predicted)	629.5	2.24719	0.203152	11.0616	1.9253e-28	1.31851e-27	219.22	1039.78
SPNCRNA.1057		intergenic RNA (predicted)	369.941	2.17179	0.104163	20.8499	1.52718e-96	5.02841e-95	134.337	605.544
SPNCRNA.1363	SPBC428.15-antisense-1	antisense RNA (predicted)	551.73	2.1693	0.0927525	23.3881	5.64855e-121	2.50032e-119	201.397	902.063
SPNCRNA.1137	ubp16-antisense-1	antisense RNA (predicted)	66.6299	2.15395	0.258019	8.34801	6.94234e-17	2.93873e-16	24.4669	108.793
SPNCRNA.1659	arg4-antisense-1	antisense RNA (predicted)	236.302	2.12241	0.133964	15.8431	1.5678e-56	2.43136e-55	88.5558	384.047	1.82084
SPRRNA.52		5.8S ribosomal RNA	161.488	2.11769	0.171012	12.3833	3.21926e-35	2.86137e-34	60.2078	262.768
SPNCRNA.1514	fnx1-antisense-1	antisense RNA (predicted)	64.5486	2.11216	0.246418	8.57146	1.02179e-17	4.50504e-17	24.2939	104.803
SPNCRNA.1459	nam1	lncRNA nam1	612.453	2.09261	0.0825457	25.3509	8.7863e-142	5.33888e-140	232.795	992.111
SPNCRNA.836	myp2-antisense-1	antisense RNA (predicted)	347.371	2.09	0.108923	19.1879	4.66715e-82	1.15538e-80	132.498	562.243
SPNCRNA.827	meu26-antisense-1	antisense RNA (predicted), possible alternative UTR	213.446	2.08995	0.140204	14.9064	2.99316e-50	3.91512e-49	81.529	345.362
SPNCRNA.739	cyp1-antisense-1	antisense RNA (predicted)	202.043	2.05468	0.139185	14.7621	2.56969e-49	3.30304e-48	78.2015	325.885
SPNCRNA.717		intergenic RNA (predicted)	103.918	2.05274	0.194278	10.566	4.2846e-26	2.68904e-25	40.2274	167.609	2.02119
SPNCRNA.1323	SPBC1198.07c-antisense-1	antisense RNA (predicted)	72.0086	2.03051	0.231945	8.75425	2.05471e-18	9.39378e-18	28.4031	115.614
SPNCRNA.955	SPAC27E2.02-antisense-1	antisense RNA (predicted)	192.12	2.00106	0.145965	13.7092	8.94351e-43	9.86442e-42	76.9225	307.319
SPNCRNA.1712	nc-pho1	translationally silent transcript from pho1 locus	1365.27	1.99799	0.0574484	34.7788	5.08778e-265	6.53975e-263	547.332	2183.21
SPNCRNA.07	meu3	non-coding RNA Meu3	149.953	1.98865	0.158766	12.5257	5.40234e-36	4.89949e-35	60.4525	239.454	2.5134
SPNCRNA.1033	SPAC19B12.01-antisense-1	antisense RNA (predicted)	130.66	1.97036	0.170405	11.5628	6.35966e-31	4.80859e-30	53.1558	208.165	3.03144
SPNCRNA.633	fal1-antisense-1	antisense RNA (predicted)	96.7597	1.96767	0.204401	9.62651	6.17956e-22	3.35533e-21	39.3616	154.158
SPNCRNA.770	gar2-antisense-1	antisense RNA (predicted)	122.739	1.94626	0.34533	5.63595	1.74097e-08	4.49639e-08	50.7162	194.761
SPNCRNA.892	tif211-antisense-1	antisense RNA (predicted)	70.4113	1.92545	0.234531	8.20982	2.21526e-16	9.12875e-16	29.3541	111.469
SPNCRNA.1042	SPAC890.05-antisense-1	antisense RNA (predicted)	4250.37	1.90567	0.0412127	46.2397	0	0	1789.88	6710.86
SPNCRNA.1365	cti6-antisense-1	antisense RNA (CUT) Cti6	288.61	1.89181	0.115438	16.3881	2.32662e-60	3.88779e-59	122.732	454.488	2.22109
SPNCRNA.807	pof14-antisense-1	antisense RNA (predicted), possible alternative UTR	227.075	1.84095	0.13283	13.8594	1.11589e-43	1.2728e-42	98.7944	355.355
SPNCRNA.103	sme2	meiosis-specific Smp foci lncRNA Sme2, long isoform	2390.84	1.8308	0.0445435	41.1014	0	0	1049.46	3732.22	5.66636
SPNCRNA.1592	dph2-antisense-1	antisense RNA (predicted)	175.137	1.8189	0.150397	12.094	1.13587e-33	9.49016e-33	77.5774	272.697
SPNCRNA.1224		antisense RNA (predicted), possible alternative UTR	66.0587	1.81347	0.243862	7.43643	1.03441e-13	3.74539e-13	29.4627	102.655
SPNCRNA.1407	SPBC337.10c-antisense-1	antisense RNA (predicted), possible alternative UTR	246.172	1.79249	0.123376	14.5287	7.96904e-48	9.84567e-47	110.481	381.864
SPNCRNA.1354	sda1-antisense-1	antisense RNA (predicted)	94.4728	1.78769	0.217571	8.21661	2.09344e-16	8.64272e-16	42.5461	146.4
SPNCRNA.960	SPAC26H5.04-antisense-1	antisense RNA (predicted)	98.575	1.77179	0.190466	9.30242	1.3729e-20	6.99958e-20	44.6998	152.45
SPSNRNA.03	snu3	small nucleolar RNA U3	125.325	1.76736	0.172112	10.2686	9.7564e-25	5.89086e-24	56.7813	193.868
SPNCRNA.1492	rct1-antisense-1	antisense RNA (predicted), possible alternative UTR	315.625	1.76451	0.111075	15.8858	7.95261e-57	1.23905e-55	143.623	487.626
SPNCRNA.1302	eno102-antisense-1	antisense RNA (predicted)	480.357	1.75803	0.0929986	18.9039	1.06018e-79	2.54902e-78	219.544	741.171	2.59375
SPNCRNA.1622		intergenic RNA (predicted)	180.843	1.75511	0.142345	12.3299	6.24999e-35	5.50394e-34	82.6078	279.079
SPNCRNA.1348		intergenic RNA (predicted)	66.712	1.75011	0.234405	7.46616	8.2566e-14	3.00583e-13	30.6772	102.747
SPNCRNA.1036	wis2-antisense-1	antisense RNA (predicted)	182.535	1.74246	0.150592	11.5708	5.7971e-31	4.40316e-30	84.372	280.698
SPNCRNA.978	SPAC27F1.10-antisense-1	antisense RNA (predicted)	91.9668	1.73951	0.201331	8.64002	5.6202e-18	2.51779e-17	42.481	141.453	1.8619
SPNCRNA.691	atg22-antisense-1	antisense RNA (predicted)	223.738	1.73053	0.129126	13.4019	5.89565e-41	6.1669e-40	103.85	343.627
SPNCRNA.1620	pgp2-antisense-1	antisense RNA (predicted), possible alternative UTR	128.627	1.72593	0.175532	9.83256	8.15168e-23	4.55187e-22	59.9938	197.261
SPNCRNA.1604		intergenic RNA (predicted)	113.986	1.71673	0.182857	9.38836	6.09442e-21	3.148e-20	53.0417	174.929
SPNCRNA.257		non-coding RNA (predicted)	73.3092	1.7151	0.218792	7.83894	4.5436e-15	1.75343e-14	34.1996	112.419	1.91676
SPNCRNA.1106	SPCC330.19c-antisense-1	antisense RNA (predicted)	103.771	1.71339	0.187493	9.13845	6.33518e-20	3.13198e-19	48.4934	159.048
SPNCRNA.530		non-coding RNA (predicted)	260.916	1.69895	0.124477	13.6487	2.05387e-42	2.23585e-41	122.702	399.13
SPNCRNA.392		non-coding RNA (predicted)	115.595	1.68364	0.192845	8.73054	2.5346e-18	1.15247e-17	55.0734	176.117	2.08553
SPNCRNA.1594	rpl1801-antisense-1	antisense RNA (predicted)	78.9455	1.67617	0.226654	7.39529	1.41099e-13	5.05959e-13	37.9122	119.979
SPNCRNA.1686	ufd1-antisense-1	antisense RNA (predicted)	293.264	1.67606	0.112531	14.8942	3.5966e-50	4.69525e-49	140.1	446.427
SPNCRNA.659	snoZ	primary transcript for snoZ3,Z4,Z5,Z7,Z8	481.466	1.64788	0.0884962	18.621	2.17322e-77	5.04369e-76	232.93	730.002
SPSNORNA.38	snR33	box H/ACA small nucleolar RNA snR33	1889.26	1.63362	0.0480888	33.9708	6.00734e-253	7.30055e-251	921.118	2857.39
SPNCRNA.1633	pex14-antisense-1	antisense RNA (predicted), possible alternative UTR	456.989	1.62688	0.0903156	18.0133	1.53164e-72	3.20923e-71	223.424	690.555
SPNCRNA.1025		intergenic RNA (predicted), possible alternative UTR	282.342	1.61522	0.118258	13.6584	1.79981e-42	1.96246e-41	138.928	425.755	1.81303
SPNCRNA.942		intergenic RNA (predicted)	328.214	1.61076	0.105355	15.2888	9.08354e-53	1.2782e-51	162.117	494.311	1.9284
SPSNRNA.07	snu32	small nucleolar RNA U3B	146.745	1.60595	0.169959	9.44903	3.42001e-21	1.78868e-20	72.7252	220.765
SPNCRNA.1579	swi3-antisense-1	antisense RNA (predicted), possible alternative UTR	209.598	1.59315	0.133839	11.9036	1.13417e-32	9.16661e-32	104.621	314.575
SPNCRNA.999	rpn10-antisense-1	antisense RNA (predicted), possible alternative UTR	108.926	1.58511	0.185019	8.56725	1.0599e-17	4.6669e-17	54.7297	163.122
SPNCRNA.1491		antisense RNA (predicted)	144.902	1.58407	0.161032	9.83699	7.8008e-23	4.35958e-22	72.7877	217.017
SPNCRNA.828		intergenic RNA (predicted)	129.099	1.57426	0.175745	8.95765	3.31672e-19	1.58352e-18	65.1158	193.082
SPSNORNA.15	snoR38	small nucleolar RNA snR38 (predicted)	91.5219	1.55941	0.196242	7.94634	1.92106e-15	7.55314e-15	46.2347	136.809
SPNCRNA.1523	SPBC365.11-antisense-1	antisense RNA (predicted), possible alternative UTR	220.337	1.53436	0.129018	11.8926	1.29253e-32	1.04213e-31	113.333	327.341
SPNCRNA.1482		intergenic RNA (predicted)	781.256	1.53057	0.0722243	21.1918	1.13552e-99	3.91227e-98	402.28	1160.23	2.48481
SPNCRNA.688	vps4-antisense-1	antisense RNA (predicted), possible alternative UTR	703.301	1.52936	0.0752981	20.3107	1.03365e-91	3.04357e-90	361.831	1044.77
SPNCRNA.1449	SPBC28F2.05c-antisense-1	antisense RNA (predicted)	253.798	1.52431	0.121145	12.5826	2.63307e-36	2.42417e-35	130.958	376.638
SPNCRNA.561	pkl1-antisense-1	antisense RNA (predicted)	296.647	1.51856	0.110909	13.6919	1.13558e-42	1.24737e-41	153.475	439.819	2.65443
SPNCRNA.602		intergenic RNA (predicted)	88.6189	1.51714	0.20407	7.43438	1.05057e-13	3.79772e-13	45.7798	131.458
SPNCRNA.301		non-coding RNA (predicted)	439.818	1.49202	0.0904365	16.498	3.79422e-61	6.48608e-60	230.479	649.157	1.89149
SPSNORNA.32	sno12	box H/ACA small nucleolar RNA 12/snR99	6525.66	1.48372	0.0362116	40.9737	0	0	3436.81	9614.51
SPNCRNA.986	srp2-antisense-1	antisense RNA (predicted), possible alternative UTR	90.9892	1.48251	0.199885	7.41679	1.19989e-13	4.32583e-13	48.1616	133.817
SPNCRNA.242		non-coding RNA (predicted)	3427.93	1.48158	0.0451786	32.794	7.17836e-236	7.61589e-234	1806.51	5049.35
SPNCRNA.1031	wsp1-antisense-1	antisense RNA (predicted)	279.902	1.4779	0.115262	12.8221	1.23341e-37	1.17104e-36	147.813	411.991
SPNCRNA.1653	cwf28-antisense-1	antisense RNA (predicted), possible alternative UTR	100.377	1.47684	0.185338	7.96838	1.60765e-15	6.35831e-15	53.1336	147.62
SPNCRNA.1332	brx1-antisense-1	antisense RNA (predicted), possible alternative UTR	215.916	1.46273	0.136134	10.7448	6.27084e-27	4.05361e-26	115.379	316.453
SPNCRNA.1634	SPBC13G1.05-antisense-1	antisense RNA (predicted), possible alternative UTR	373.776	1.46255	0.103145	14.1795	1.22633e-45	1.45333e-44	198.735	548.817
SPNCRNA.649	lsd2-antisense-1	antisense RNA (predicted)	100.467	1.46132	0.18537	7.88329	3.18877e-15	1.23845e-14	53.5148	147.42
SPNCRNA.643	trm112-antisense-1	antisense RNA (predicted)	84.3806	1.45599	0.207404	7.02005	2.21785e-12	7.44557e-12	45.3214	123.44
SPNCRNA.1023	rex3-antisense-1	antisense RNA (predicted), possible alternative UTR	649.053	1.44583	0.080195	18.029	1.15453e-72	2.44205e-71	348.834	949.272
SPNCRNA.1405	prp2-antisense-1	antisense RNA (predicted)	69.4796	1.44429	0.242642	5.95238	2.64272e-09	7.22747e-09	37.5451	101.414
SPNCRNA.380		non-coding RNA (predicted)	193.072	1.42189	0.142847	9.95399	2.42276e-23	1.37819e-22	104.843	281.301
SPNCRNA.1054		intergenic RNA (predicted), possible alternative UTR	104.623	1.42045	0.190269	7.46549	8.29927e-14	3.01972e-13	56.7255	152.521
SPNCRNA.1145		antisense RNA (predicted)	282.235	1.41813	0.110262	12.8615	7.40979e-38	7.0652e-37	153.792	410.679
SPNCRNA.56	prl56	antisense RNA (predicted)	138.58	1.41535	0.157063	9.01134	2.03563e-19	9.81683e-19	75.4052	201.755
SPSNORNA.19	snoR69	small nucleolar RNA	132.558	1.41378	0.159751	8.84991	8.75905e-19	4.08552e-18	72.4671	192.649
SPNCRNA.04	prl4	non-coding RNA, poly(A)-bearing (predicted)	134.905	1.40096	0.160437	8.73215	2.49876e-18	1.13695e-17	74.2229	195.586	3.00852
SPNCRNA.1229	SPCC1442.13c-antisense-1	antisense RNA (predicted)	106.72	1.4007	0.178593	7.84296	4.40046e-15	1.69917e-14	58.6899	154.749
SPNCRNA.991	mfs1-antisense-1	antisense RNA (predicted)	296.402	1.40036	0.109178	12.8265	1.16572e-37	1.10834e-36	162.912	429.893
SPNCRNA.1675	SPBC1861.05-antisense-1	antisense RNA (predicted)	106.884	1.3995	0.190992	7.32751	2.34463e-13	8.33592e-13	58.7495	155.018
SPNCRNA.1564	SPBC1703.11-antisense-1	antisense RNA (predicted)	238.073	1.38029	0.12117	11.3914	4.61698e-30	3.36898e-29	132.097	344.049
SPNCRNA.626		intergenic RNA (predicted), possible alternative UTR	261.91	1.3779	0.118283	11.6491	2.31779e-31	1.78893e-30	145.646	378.174	1.9116
SPNCRNA.1445	SPBC27.01c-antisense-1	antisense RNA (predicted)	184.354	1.34913	0.135591	9.95001	2.52157e-23	1.43318e-22	104.019	264.69
SPNCRNA.1517	srm1-antisense-1	antisense RNA (predicted), possible alternative UTR	494.116	1.33638	0.0851156	15.7008	1.49326e-55	2.2684e-54	280.685	707.547
SPNCRNA.1320	fmd2-antisense-1	antisense RNA (predicted)	374.316	1.33506	0.0971815	13.7378	6.02399e-43	6.68843e-42	212.223	536.409
SPNCRNA.902	SPAC26A3.17c-antisense-1	antisense RNA (predicted)	204.134	1.33349	0.128885	10.3463	4.34897e-25	2.65952e-24	116.083	292.185
SPNCRNA.1553		intergenic RNA (predicted)	202.765	1.32867	0.131201	10.127	4.19121e-24	2.47912e-23	115.562	289.969
SPNCRNA.887	slx4-antisense-1	antisense RNA (predicted)	411.196	1.32649	0.0975301	13.6008	3.95941e-42	4.28231e-41	234.329	588.063
SPNCRNA.1398	SPBC646.03-antisense-1	antisense RNA (predicted)	466.777	1.32481	0.0897691	14.7579	2.73549e-49	3.50941e-48	266.445	667.11
SPNCRNA.1294	SPCC1827.07c-antisense-1	antisense RNA (predicted)	453.263	1.32153	0.0881003	15.0003	7.30746e-51	9.76861e-50	259.053	647.473	1.93504
SPNCRNA.861		intergenic RNA (predicted)	297.541	1.30392	0.110869	11.7609	6.20545e-32	4.87968e-31	171.694	423.389
SPNCRNA.1629	SPBP8B7.18c-antisense-1	antisense RNA (predicted)	428.042	1.29443	0.0908303	14.2511	4.41532e-46	5.2606e-45	248.011	608.073	1.57356
SPNCRNA.670		intergenic RNA (predicted), possible alternative UTR	360.104	1.28712	0.103397	12.4483	1.42852e-35	1.28509e-34	209.808	510.401
SPNCRNA.974		intergenic RNA (predicted)	174.368	1.28552	0.144397	8.90266	5.45233e-19	2.57733e-18	101.48	247.256
SPNCRNA.1259		intergenic RNA (predicted), possible alternative UTR	133.192	1.27877	0.159295	8.02768	9.93315e-16	3.96851e-15	77.8023	188.583	1.5974
SPNCRNA.545		non-coding RNA (predicted)	82.966	1.26577	0.202972	6.23617	4.48422e-10	1.29751e-09	48.8553	117.077	2.35359
SPNCRNA.702	spn2-antisense-1	antisense RNA (predicted)	84.0433	1.26116	0.208917	6.03662	1.57373e-09	4.38649e-09	49.381	118.706
SPNCRNA.1570	abc1-antisense-1	antisense RNA (predicted), possible alternative UTR	529.523	1.25697	0.0820731	15.3152	6.05346e-53	8.6088e-52	312.445	746.601
SPNCRNA.388		non-coding RNA (predicted)	1307.34	1.25315	0.0582279	21.5214	9.80587e-103	3.58156e-101	773.783	1840.9
SPNCRNA.98	srp7	7SL signal recognition particle component	96.4836	1.2381	0.188058	6.58358	4.59255e-11	1.41524e-10	57.4145	135.553
SPNCRNA.799	ata1-antisense-1	antisense RNA (predicted)	101.331	1.23738	0.179962	6.87577	6.1657e-12	2.01032e-11	60.4513	142.212
SPNCRNA.905	SPAC8E11.01c-antisense-1	antisense RNA (predicted)	400.006	1.23623	0.0924614	13.3702	9.03024e-41	9.41625e-40	238.621	561.392
SPNCRNA.1006	dhc1-antisense-1	antisense RNA (predicted)	117.07	1.2362	0.177194	6.97655	3.02506e-12	1.00695e-11	70.0174	164.122	2.22118
SPNCRNA.1005	SPAC1093.05-antisense-1	antisense RNA (predicted)	134.602	1.22223	0.167228	7.30876	2.69618e-13	9.5553e-13	80.7745	188.429
SPNCRNA.769	SPAPB1A10.13-antisense-1	antisense RNA (predicted)	152.193	1.22132	0.149523	8.16813	3.132e-16	1.28352e-15	91.2884	213.097
SPNCRNA.405		non-coding RNA (predicted)	165.477	1.20807	0.150886	8.00652	1.17996e-15	4.69175e-15	100.243	230.71	3.06301
SPNCRNA.1289	ubp12-antisense-1	antisense RNA (predicted)	82.2849	1.20288	0.200721	5.99277	2.06291e-09	5.67896e-09	49.9162	114.654
SPNCRNA.1494	meu17-antisense-1	antisense RNA (predicted), possible alternative UTR	702.798	1.19968	0.0749712	16.0018	1.24089e-57	1.96078e-56	426.452	979.144	2.95787
SPNCRNA.752	ubx3-antisense-1	antisense RNA (predicted)	313.052	1.19791	0.10429	11.4863	1.54556e-30	1.15684e-29	189.854	436.25
SPNCRNA.1280	SPCC965.04c-antisense-1	antisense RNA (predicted), possible alternative UTR	348.478	1.19512	0.106757	11.1948	4.32191e-29	3.04722e-28	211.709	485.246
SPNCRNA.173		non-coding RNA (predicted)	78.2681	1.19404	0.218871	5.45543	4.88557e-08	1.21485e-07	47.5345	109.002	2.9611
SPNCRNA.606	isp3-antisense-1	antisense RNA (predicted)	80.53	1.18282	0.210914	5.60806	2.04605e-08	5.25991e-08	49.225	111.835
SPSNORNA.45	snR93	box H/ACA small nucleolar RNA snR93	351.759	1.17271	0.102545	11.4361	2.76157e-30	2.03734e-29	215.882	487.637
SPNCRNA.1301	grt1-antisense-1	antisense RNA (predicted)	281.639	1.17056	0.108689	10.7699	4.77623e-27	3.11153e-26	173.381	389.897	2.1832
SPNCRNA.1003	SPAC12B10.15c-antisense-1	antisense RNA (predicted)	192.481	1.16684	0.13688	8.5246	1.53343e-17	6.69025e-17	118.841	266.12
SPNCRNA.1593	acr1-antisense-1	antisense RNA (predicted)	142.906	1.16323	0.153665	7.56986	3.7362e-14	1.38738e-13	88.3195	197.493
SPNCRNA.1352		intergenic RNA (predicted)	463.038	1.15251	0.0855163	13.4771	2.13289e-41	2.26289e-40	287.502	638.573
SPNCRNA.1451	cdc28-antisense-1	antisense RNA (predicted)	464.139	1.15146	0.0853611	13.4893	1.80819e-41	1.92452e-40	287.942	640.336
SPNCRNA.1082	sec16-antisense-1	antisense RNA (predicted)	585.691	1.14905	0.0768852	14.945	1.67856e-50	2.20857e-49	363.875	807.508
SPNCRNA.704	oac1-antisense-1	antisense RNA (predicted)	253.881	1.14405	0.114755	9.96952	2.07236e-23	1.18087e-22	158.29	349.473
SPNCRNA.1573	SPBC15D4.05-antisense-1	antisense RNA (predicted)	167.217	1.14066	0.140974	8.09126	5.90488e-16	2.38479e-15	104.425	230.009
SPSNORNA.40	snR42	box H/ACA small nucleolar RNA snR42	1809.58	1.12958	0.0520916	21.6844	2.87771e-104	1.08059e-102	1135.01	2484.15
SPNCRNA.1074	SPAP8A3.13c-antisense-1	antisense RNA (predicted)	359.215	1.12682	0.101284	11.1254	9.44159e-29	6.56004e-28	226.107	492.322
SPNCRNA.1001	pby1-antisense-1	antisense RNA (predicted)	333.569	1.12131	0.10257	10.9321	8.09345e-28	5.40966e-27	210.438	456.701
SPNCRNA.1450	ngg1-antisense-1	antisense RNA (predicted)	99.7671	1.11721	0.179923	6.2094	5.3188e-10	1.53303e-09	62.8971	136.637
SPNCRNA.1037	SPAC1B3.04c-antisense-2	antisense RNA (predicted)	114.954	1.1146	0.167534	6.65299	2.87192e-11	8.97007e-11	72.6983	157.21	1.89343
SPNCRNA.580	tdp1-antisense-1	antisense RNA (predicted)	76.0041	1.11315	0.218562	5.09306	3.5233e-07	8.18552e-07	48.0892	103.919
SPNCRNA.1478	pab2-antisense-1	antisense RNA (predicted)	137.901	1.10854	0.158901	6.9763	3.03048e-12	1.00825e-11	87.5337	188.269
SPNCRNA.891	bet5-antisense-1	antisense RNA (predicted)	131.645	1.1073	0.164271	6.7407	1.57624e-11	5.01165e-11	83.4012	179.889
SPNCRNA.666	nab3-antisense-1	antisense RNA (predicted)	455.939	1.10613	0.0900694	12.2809	1.14734e-34	9.94658e-34	289.133	622.746
SPNCRNA.719	SPAC22A12.14c-antisense-1	antisense RNA (predicted), possible alternative UTR	136.99	1.09489	0.16582	6.60284	4.03358e-11	1.24817e-10	87.5039	186.476
SPNCRNA.919		intergenic RNA (predicted), possible alternative UTR	79.3879	1.09423	0.207833	5.26495	1.40231e-07	3.36433e-07	50.7522	108.024
SPNCRNA.1687	vps10-antisense-1	antisense RNA (predicted)	461.89	1.08955	0.0858745	12.6877	6.91761e-37	6.42185e-36	295.535	628.244	1.63806
SPNCRNA.29	meu19	non-coding RNA, poly(A)-bearing (predicted)	200.649	1.08764	0.12853	8.46215	2.625e-17	1.1371e-16	128.405	272.893	2.07572
SPNCRNA.82	mrp1	RNAse MRP	744.998	1.0804	0.0771373	14.0061	1.42984e-44	1.66209e-43	477.751	1012.25
SPNCRNA.1508	iws1-antisense-1	antisense RNA (predicted)	186.999	1.07588	0.137575	7.82029	5.26998e-15	2.0279e-14	120.426	253.572
SPNCRNA.1603	trs3-antisense-1	antisense RNA (predicted)	362.626	1.07292	0.0973388	11.0225	2.97685e-28	2.01798e-27	233.46	491.792
SPNCRNA.195		non-coding RNA (predicted)	76.3109	1.07141	0.211591	5.0636	4.11423e-07	9.50881e-07	49.2884	103.333
SPNCRNA.1584	ptn1-antisense-1	antisense RNA (predicted)	162.28	1.06961	0.157097	6.80861	9.85464e-12	3.17438e-11	104.836	219.724
SPNCRNA.1018	SPAC1834.13-antisense-1	antisense RNA (predicted), possible alternative UTR	147.193	1.06937	0.154389	6.92647	4.3146e-12	1.41853e-11	94.8755	199.511
SPNCRNA.1086	SPAC1039.08-antisense-1	antisense RNA (predicted), possible alternative UTR	96.4642	1.06808	0.185692	5.75189	8.82509e-09	2.32506e-08	62.2821	130.646	1.53359
SPNCRNA.239		intergenic RNA (predicted)	226.898	1.06704	0.120687	8.84139	9.45333e-19	4.40321e-18	146.573	307.223
SPNCRNA.1107		intergenic RNA (predicted)	243.275	1.05525	0.11831	8.91939	4.68863e-19	2.23052e-18	158.224	328.326
SPNCRNA.1664	tim54-antisense-1	antisense RNA (predicted), possible alternative UTR	190.991	1.05194	0.132731	7.92536	2.27484e-15	8.92316e-15	124.499	257.483
SPNCRNA.1618	rft1-antisense-1	antisense RNA (predicted), possible alternative UTR	327.36	1.05164	0.101792	10.3312	5.09111e-25	3.11051e-24	213.359	441.361
SPNCRNA.971	SPAC694.03-antisense-1	antisense RNA (predicted), possible alternative UTR	254.033	1.04951	0.11343	9.25243	2.19456e-20	1.10705e-19	165.614	342.453
SPNCRNA.513		non-coding RNA (predicted)	352.213	1.04596	0.100833	10.3732	3.28182e-25	2.01429e-24	229.909	474.516	2.12268
SPNCRNA.1269		intergenic RNA (predicted)	76.4482	1.0414	0.207712	5.01368	5.34001e-07	1.22361e-06	49.9393	102.957
SPNCRNA.1406	rhn1-antisense-1	antisense RNA (predicted)	93.3499	1.04061	0.18586	5.59886	2.15764e-08	5.53616e-08	61.1697	125.53
SPNCRNA.1587	cdc7-antisense-1	antisense RNA (predicted)	182.438	1.02854	0.141256	7.28141	3.3035e-13	1.1652e-12	120.09	244.786	2.57773
SPNCRNA.813	SPAC6C3.03c-antisense-1	antisense RNA (predicted)	396.109	1.00717	0.0936613	10.7533	5.7186e-27	3.70379e-26	263.466	528.751	1.87054
SPNCRNA.1149	SPCC5E4.10c-antisense-1	antisense RNA (predicted)	135.602	1.00708	0.159565	6.3114	2.7653e-10	8.13167e-10	89.9831	181.221
SPNCRNA.1473	spo14-antisense-1	antisense RNA (predicted)	78.0531	1.00674	0.202567	4.9699	6.69875e-07	1.52398e-06	51.888	104.218
SPNCRNA.698		intergenic RNA (predicted), possible alternative UTR	407.186	1.00346	0.0932146	10.765	5.0355e-27	3.27724e-26	270.6	543.772
SPNCRNA.915		intergenic RNA (predicted)	117.698	1.0032	0.191149	5.24829	1.53514e-07	3.67378e-07	78.1057	157.29
SPNCRNA.853		antisense RNA (predicted)	250.573	1.00045	0.11597	8.62681	6.30888e-18	2.81499e-17	166.959	334.187
SPNCRNA.1040	SPAC1952.08c-antisense-1	antisense RNA (predicted), possible alternative UTR	106.577	1.00028	0.175119	5.71199	1.11663e-08	2.92345e-08	70.9575	142.196

## Sheet: nc_DOWN
Systematic ID	Gene name	Product	baseMean	log2FoldChange	lfcSE	stat	pvalue	padj	WT_average_norm_count	Y86D_average_norm_count
SPNCRNA.1471	pof9-antisense-1	antisense RNA (predicted)	342.744	-1.85441	0.112897	-16.4257	1.25175e-60	2.10219e-59	536.807	148.681
SPNCRNA.291		intergenic RNA (predicted)	233.478	-1.81503	0.132563	-13.6918	1.13652e-42	1.24737e-41	363.963	102.992
SPNCRNA.1626		antisense RNA (predicted)	3048.78	-1.74685	0.0406927	-42.9279	0	0	4697.56	1400
SPNCRNA.648		intergenic RNA (predicted)	130.312	-1.47767	0.169323	-8.72693	2.6168e-18	1.18823e-17	191.682	68.941
SPNCRNA.1389		intergenic RNA (predicted)	289.717	-1.46625	0.112241	-13.0634	5.32901e-39	5.32423e-38	425.64	153.794
SPNCRNA.696	mcp1-antisense-1	antisense RNA (predicted)	77.107	-1.30471	0.213683	-6.10583	1.02266e-09	2.88783e-09	109.875	44.3391
SPNCRNA.1271	ckk2-antisense-1	antisense RNA (predicted), possible alternative UTR	86.6139	-1.29032	0.202098	-6.38466	1.71782e-10	5.11672e-10	122.792	50.4361
SPNCRNA.783		intergenic RNA (predicted)	154.899	-1.24316	0.148685	-8.36105	6.21604e-17	2.64132e-16	217.882	91.9172
SPNCRNA.1599	ptk1-antisense-1	antisense RNA (predicted)	416.203	-1.23699	0.0921816	-13.4191	4.67348e-41	4.89617e-40	584.324	248.082
SPNCRNA.1641	vps13a-antisense-2	antisense RNA (predicted)	185.789	-1.20913	0.140319	-8.61704	6.87085e-18	3.05554e-17	259.026	112.552
SPNCRNA.1673		intergenic RNA (predicted)	193.71	-1.20756	0.140236	-8.61089	7.24968e-18	3.22187e-17	270.747	116.672
SPNCRNA.1299		intergenic RNA (predicted)	82.3535	-1.15532	0.442531	-2.6107	0.00903571	0.0137261	113.64	51.0668
SPNCRNA.1602	hop1-antisense-1	antisense RNA (predicted)	540.279	-1.15174	0.0855815	-13.4578	2.76898e-41	2.92383e-40	745.371	335.187
SPNCRNA.1560		antisense RNA (predicted)	253.28	-1.14216	0.115924	-9.85263	6.67707e-23	3.74409e-22	348.535	158.025
SPNCRNA.1277	pep3-antisense-1	antisense RNA (predicted)	110.855	-1.12183	0.174463	-6.43017	1.27458e-10	3.82718e-10	152.107	69.6024
SPNCRNA.1180	rec11-antisense-1	antisense RNA (predicted)	82.3035	-1.12138	0.209577	-5.35071	8.76105e-08	2.13796e-07	112.513	52.0944
SPSNORNA.12	snoR02	small nucleolar RNA snoR02 (predicted)	293.187	-1.11459	0.106854	-10.431	1.79088e-25	1.10631e-24	401.175	185.199
SPNCRNA.1297		intergenic RNA (predicted), possible alternative UTR	146.888	-1.09414	0.149983	-7.29512	2.9839e-13	1.05526e-12	200.153	93.6234
SPNCRNA.1555		intergenic RNA (predicted), possible alternative UTR	100.807	-1.08767	0.182974	-5.94439	2.77483e-09	7.57328e-09	137.114	64.5006
SPNCRNA.703		intergenic RNA (predicted)	171.82	-1.07728	0.141166	-7.63129	2.32418e-14	8.69325e-14	233.141	110.499
SPNCRNA.763	sgt1-antisense-1	antisense RNA (predicted)	445.134	-1.05539	0.0911901	-11.5735	5.61699e-31	4.27121e-30	601.396	288.872
SPNCRNA.1182		intergenic RNA (predicted)	200.814	-1.0517	0.130685	-8.04761	8.44242e-16	3.38914e-15	270.593	131.036
SPNCRNA.1353	SPBC106.12c-antisense-1	antisense RNA (predicted)	150.518	-1.02069	0.147348	-6.92705	4.297e-12	1.41344e-11	201.589	99.4477
SPNCRNA.1278		intergenic RNA (predicted)	206.055	-1.01531	0.127982	-7.93326	2.1346e-15	8.37797e-15	275.658	136.452
